# Supplementary material for: CRIF1-CDK2 Interface Inhibitors Enhance Taxol Inhibition of the Lethal Triple-Negative Breast Cancer
Source: Cancers (Basel). 2022 Feb 16;14(4):989. doi: 10.3390/cancers14040989 (PMC8870401; doi:10.3390/cancers14040989)
Supplement: Supplementary file 1 [file cancers-14-00989-s001.zip › cancers-1558749-supplementary.pdf]

# CRIF1–CDK2 Interface Inhibitors Enhance Taxol Inhibition of the Lethal Triple-Negative Breast Cancer

Xiaoye Sang, Nassira Belmessabih, Ruixuan Wang, Preyesh Stephen and Sheng-Xiang Lin

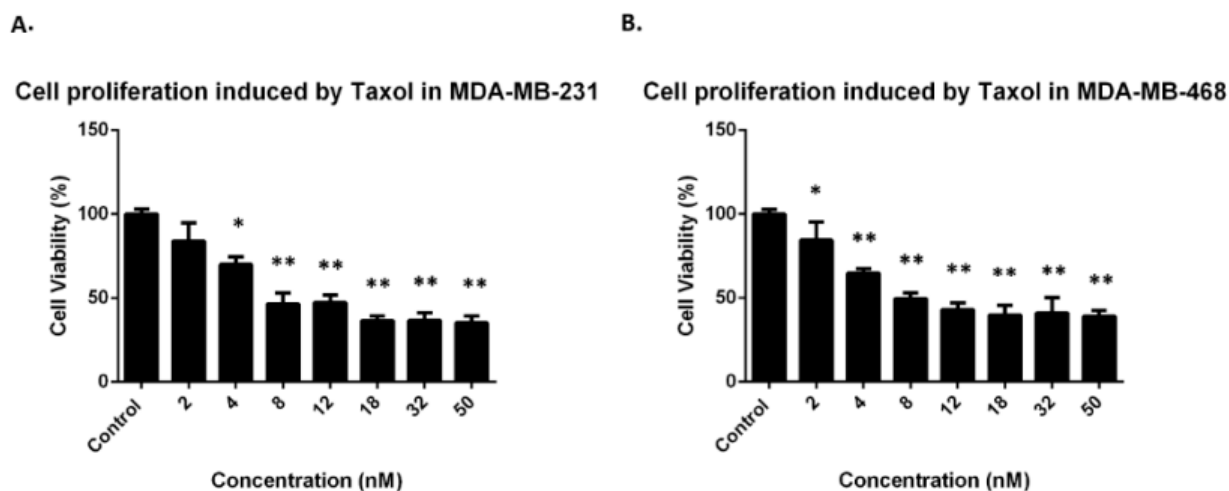

**Figure S1.** Cell proliferation in response to Taxol in TNBC cell lines. Cell proliferation was determined by Cell Proliferation Reagent WST-1 in MDA-MB-231 (**A**) and MDA-MB-468 (**B**) cells treated with different concentrations of Taxol for 4 days. Data are reported as % of DNA synthesis vs. control (100%). Each point represents the mean of four replications (mean  $\pm$  SD). Statistical significance by one-way ANOVA: \*  $p < 0.05$  vs. control (Ctrl); \*\*  $p < 0.01$  vs. control (Ctrl).

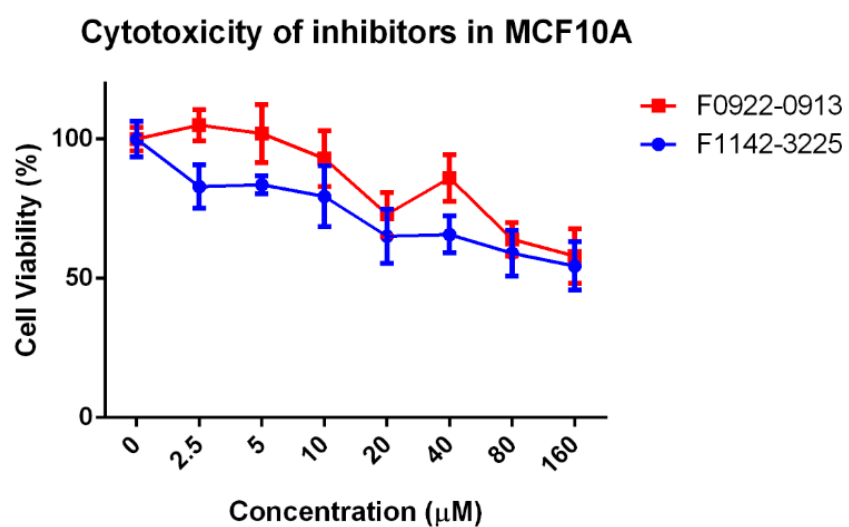

**Figure S2.** Cytotoxicity of inhibitors in MCF10A. The cytotoxicity of F1142-3225 and F0922-0913 in MCF10A cells were evaluated by Cell Proliferation Reagent WST-1. Cells were treated with inhibitors for 4 days. Data are reported as % of DNA synthesis vs. control (100%). Each point represents the mean of four replications (mean  $\pm$  SD).

### CRIF1 expression in MDA-MB-231 and MDA-MB-468

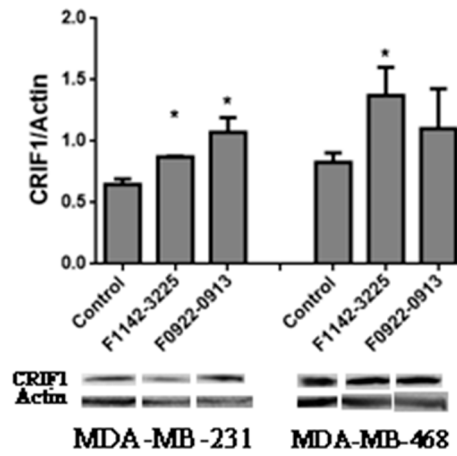

**Figure S3.** The CRIF1 protein expression in TNBC cell lines. CRIF1 protein expression after treatment with F1142-3225 or F0922-0913 for 48 h was determined by western blot in MDA-MB-231 cells and MDA-MB-468 cells. Data are reported as the mean  $\pm$  SD ( $n = 3$ ) of the individual experiments. Statistical significance was determined by Student's test: \*  $p < 0.05$  vs. control (Ctrl).

MDA-MB-231

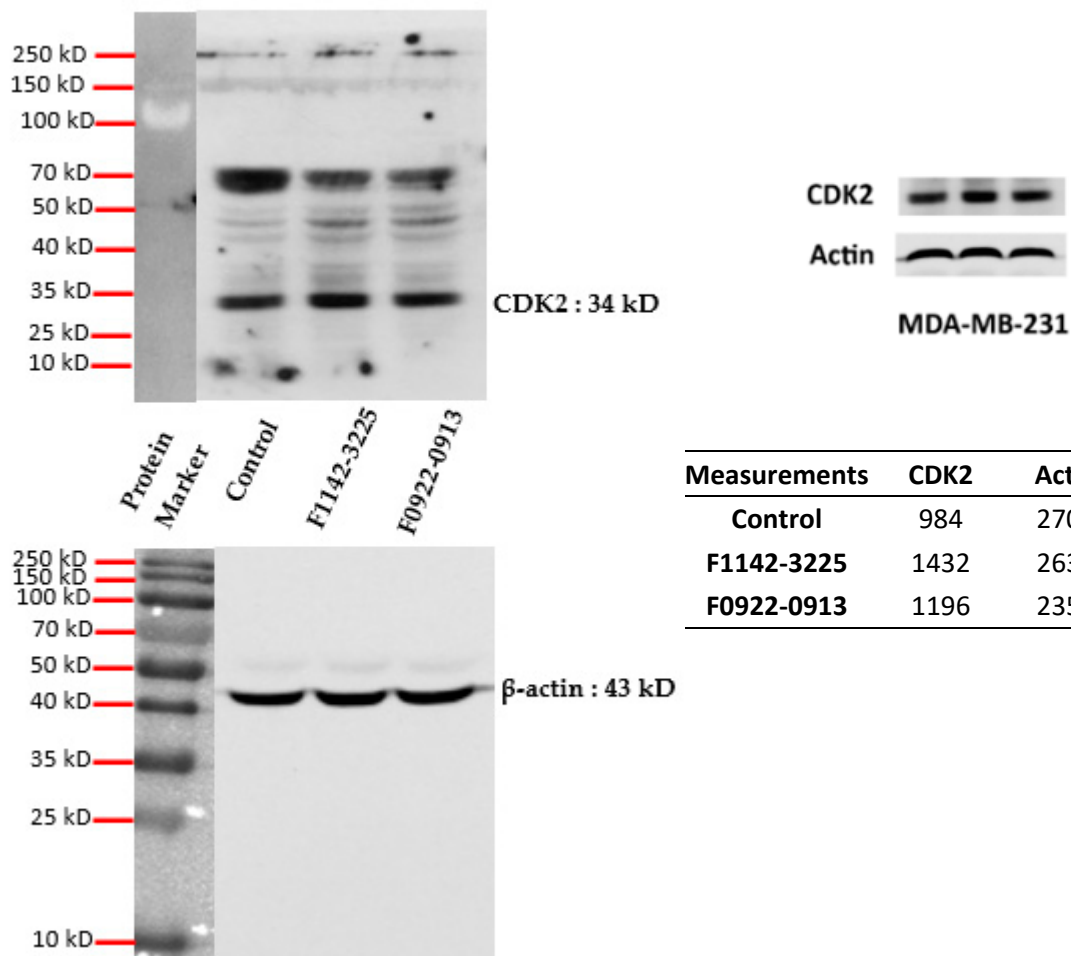

MDA-MB-468

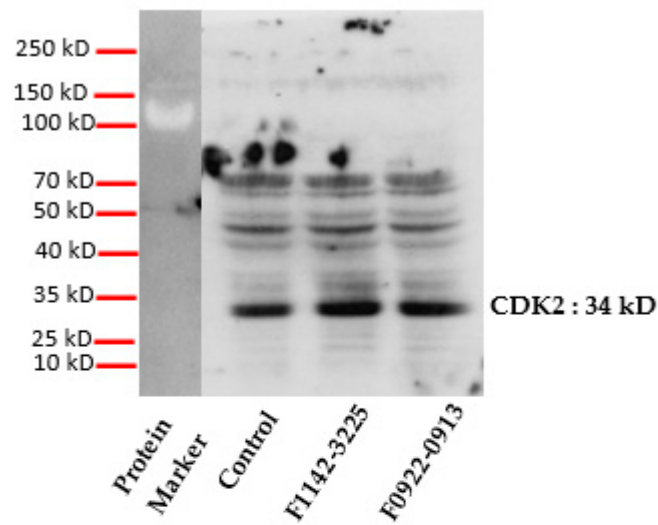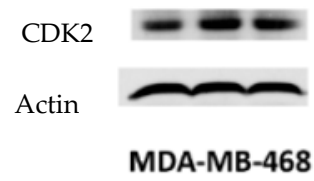

| Measurements | CDK2 | Actin | CDK2/Actin |
|--------------|------|-------|------------|
| Control      | 991  | 3232  | 0.306      |
| F1142-3225   | 1637 | 3487  | 0.469      |
| F0922-0913   | 1372 | 3798  | 0.361      |

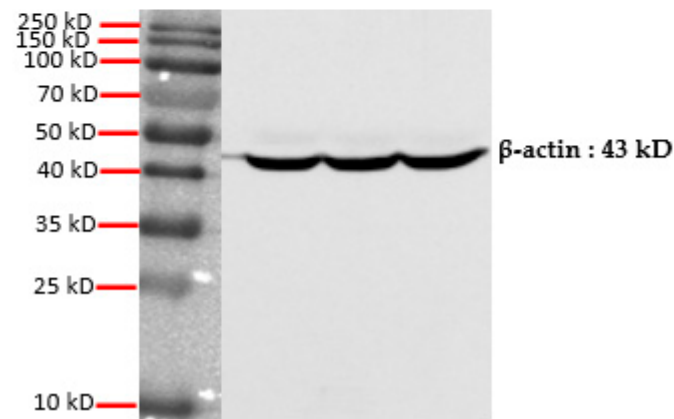

Whole blot for **Figure 3B**. Whole blot membrane showing bands with all molecular weight markers.

MDA-MB-231

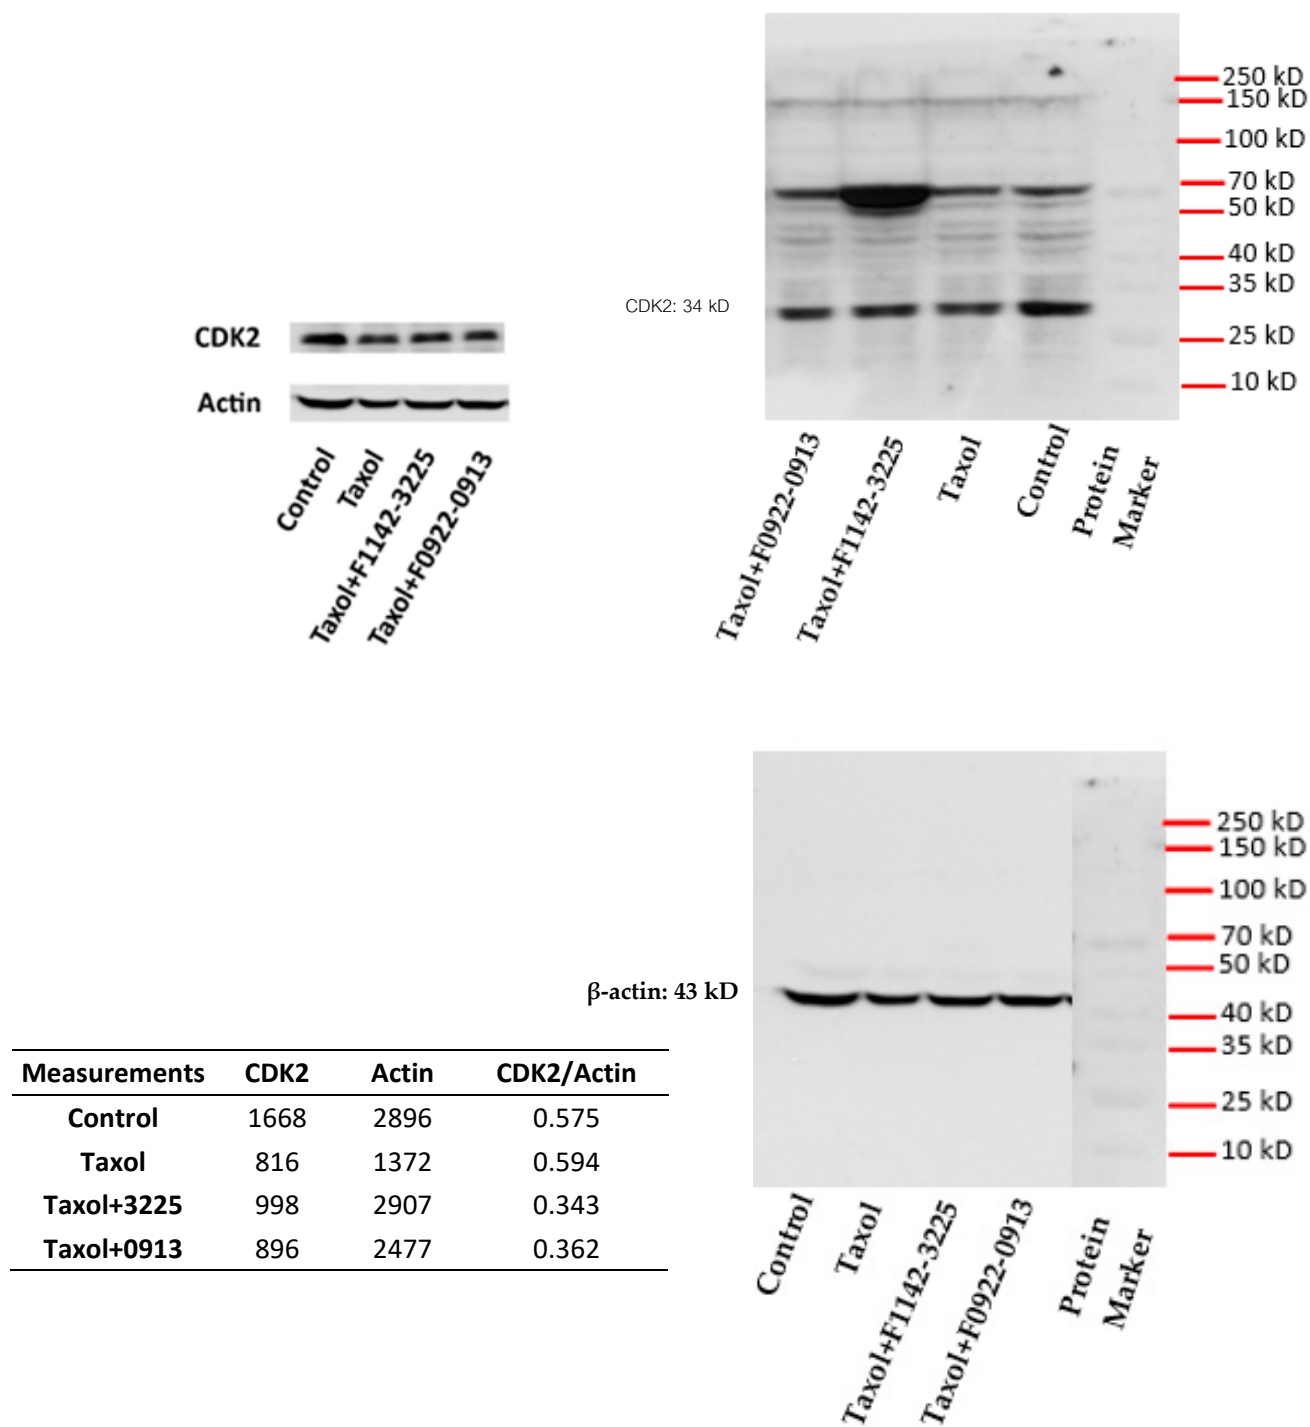

Whole blot for **Figure 7B**. Whole blot membrane showing bands with all molecular weight markers.

## MCF-10A

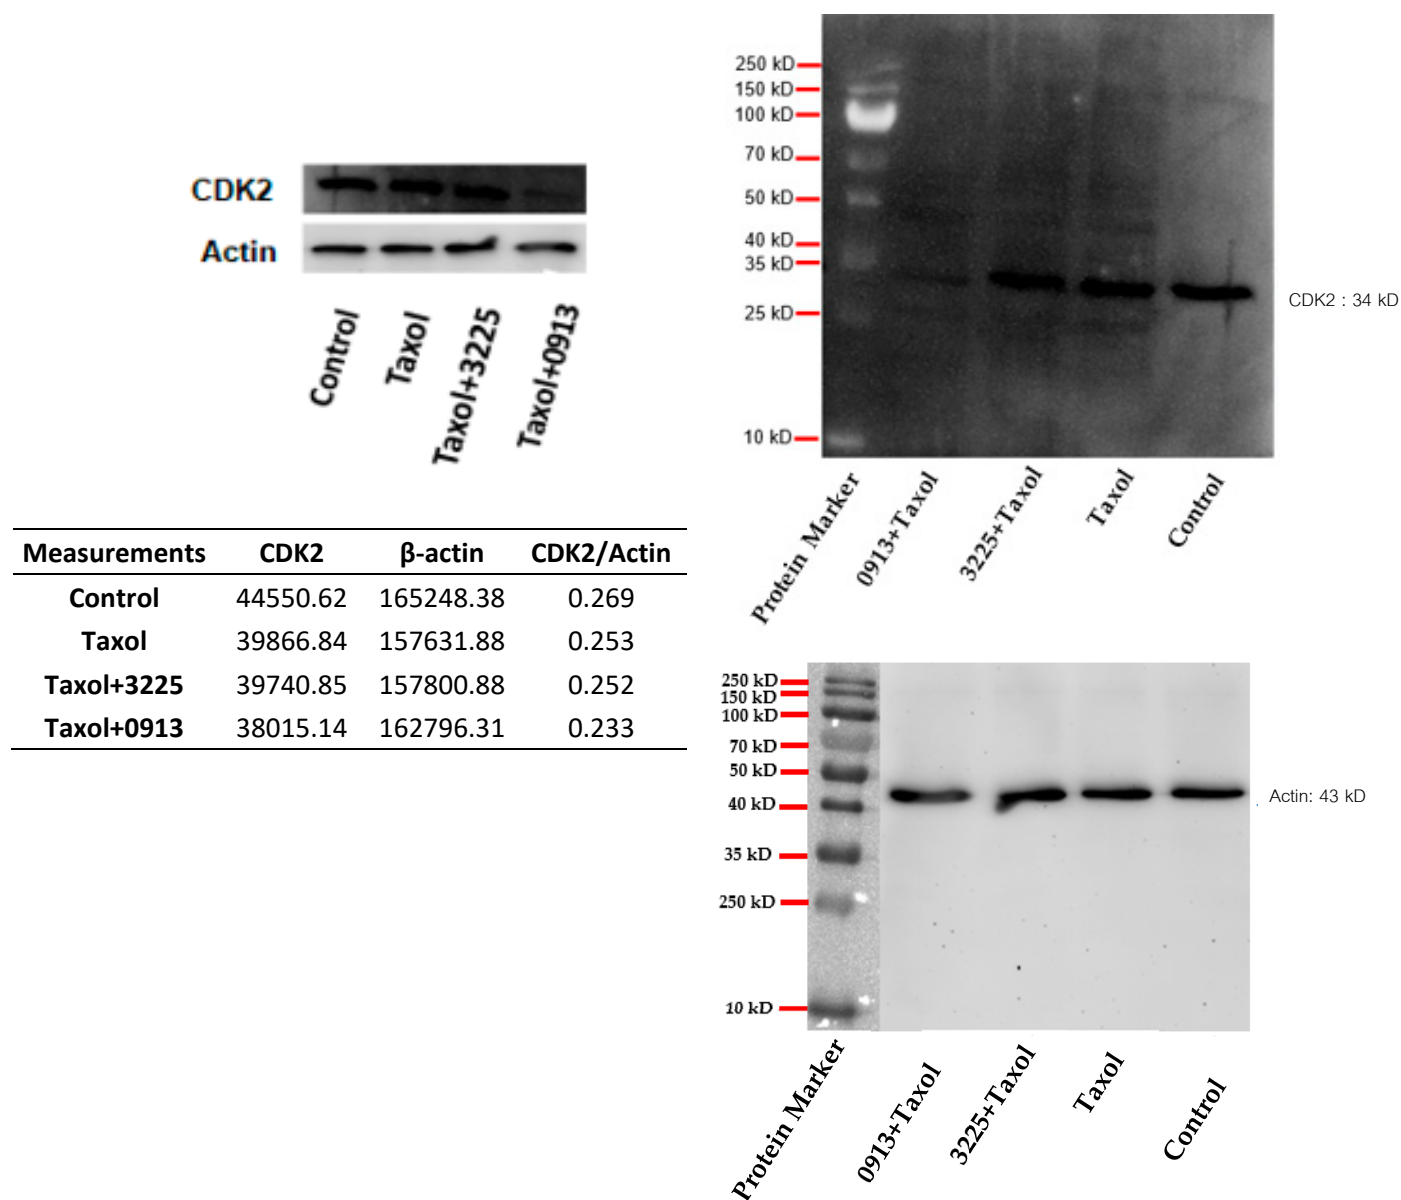

Whole blot for **Figure 7C**. Whole blot membrane showing bands with all molecular weight markers.

## MDA-MB-231

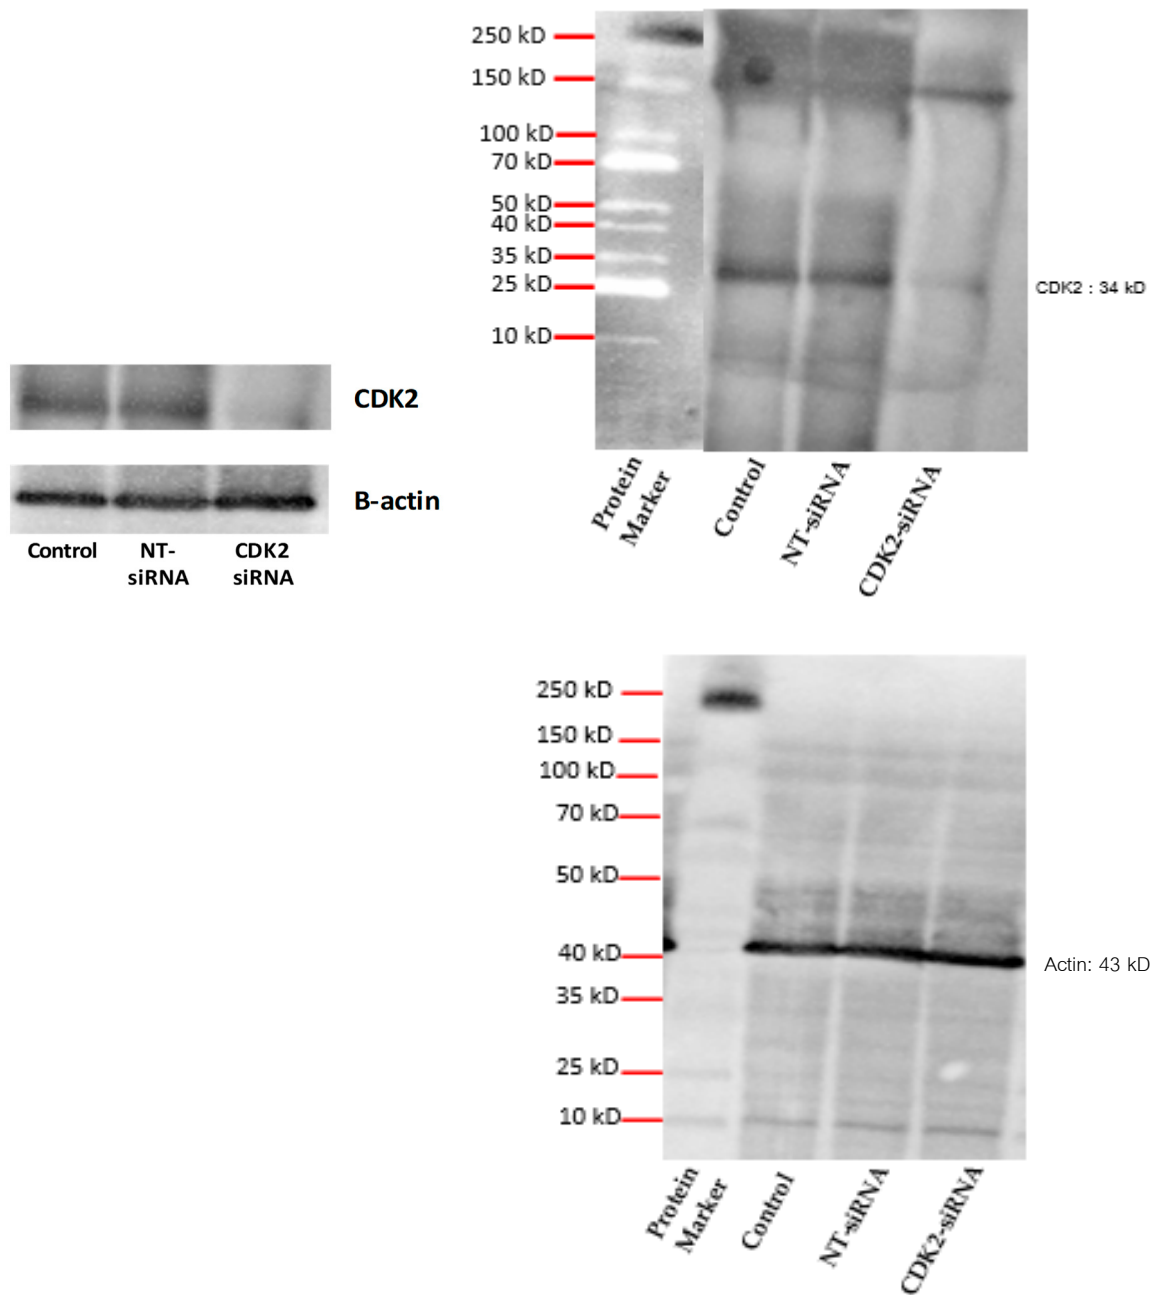

Whole blot for **Figure 8C**. Whole blot membrane showing bands with all molecular weight markers.

# CRIF1 expression in MDA-MB-231 and MDA-MB-468

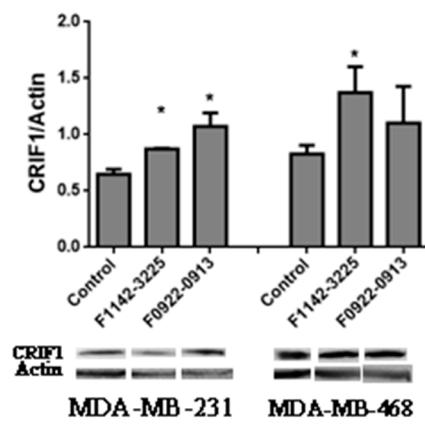

## MDA-MB-231

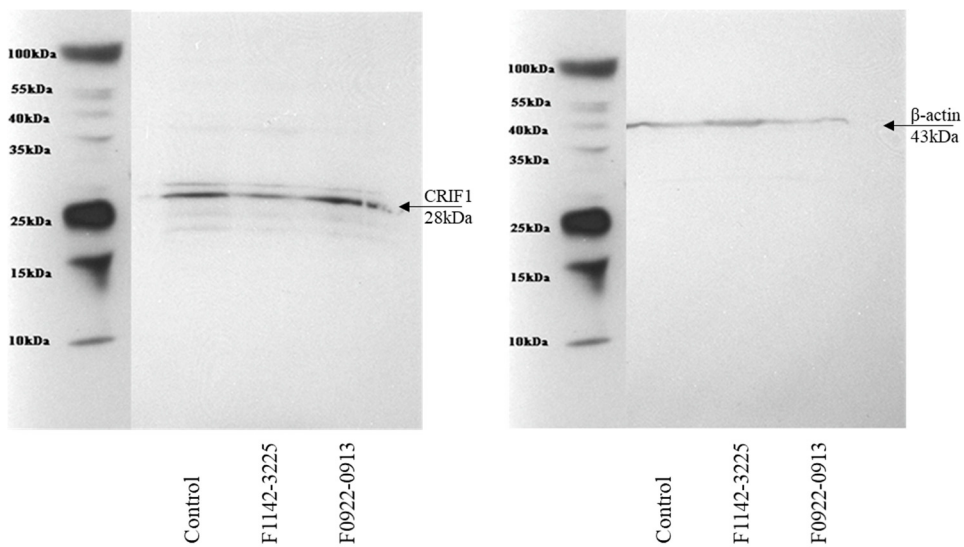

## MDA-MB-468

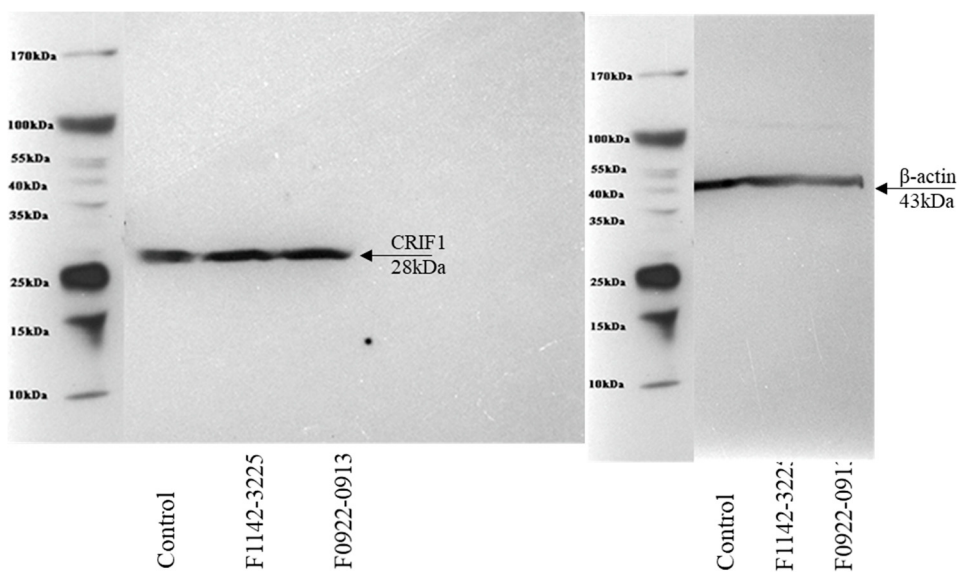

Whole blot for **Figure S3**. Whole blot membrane showing bands with all molecular weight markers.

Densitometry reading and density ratio:

| Measurements | Inhibitor or Control | CRIF1   | B-Actin | CRIF1/ $\beta$ -Actin (Mean Value for Repeat Experiments) |
|--------------|----------------------|---------|---------|-----------------------------------------------------------|
| MDA-MB-231   | Control              | 256,000 | 414,000 | 0.649796                                                  |
|              | F1142-3225           | 164,000 | 187,000 | 0.874332                                                  |
|              | F0922-0913           | 246,000 | 249,000 | 1.072579                                                  |
| MDA-MB-468   | Control              | 553,000 | 613,000 | 0.826922                                                  |
|              | F1142-3225           | 670,000 | 485,000 | 1.372412                                                  |
|              | F0922-0913           | 566,000 | 433,000 | 1.104548                                                  |

**Table S1.** Inhibitor characteristics.

| Compound   | Protein Target | Chemical Structure                                                                                                                                                                                                                                                                                                                                                                                                                                                      |
|------------|----------------|-------------------------------------------------------------------------------------------------------------------------------------------------------------------------------------------------------------------------------------------------------------------------------------------------------------------------------------------------------------------------------------------------------------------------------------------------------------------------|
| F1142-3225 | CRIF1          | 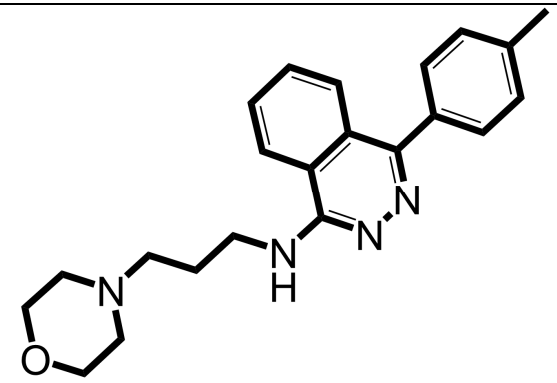<br>The chemical structure of F1142-3225 features a 1,2,3-triazole ring substituted with a 4-methylphenyl group at position 4 and a (4-morpholinyl)propyl group at position 1. The triazole ring is connected via its 5-position to a 1,2,4-triazole ring, which is further substituted with a 4-methylphenyl group at position 4 and a (4-morpholinyl)propyl group at position 1.    |
| F0922-0913 | CRIF1          | 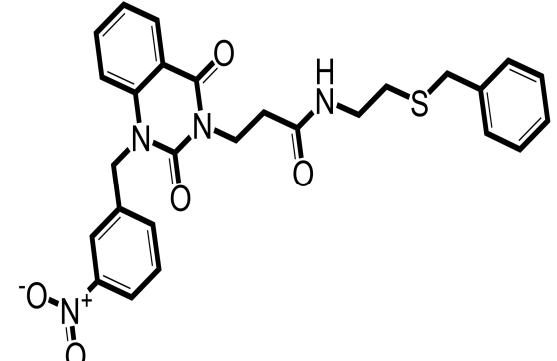<br>The chemical structure of F0922-0913 consists of a 1,2,4-triazole ring substituted with a 4-nitrophenyl group at position 4 and a (4-morpholinyl)propyl group at position 1. The triazole ring is connected via its 5-position to a 1,2,4-triazole ring, which is further substituted with a 4-methylphenyl group at position 4 and a (4-morpholinyl)propyl group at position 1. |
